# Supplementary material for: The prognosis of functional limb weakness: a 14-year case-control study
Source: Oxford University Press journal article supplement (doi:10.1093/brain/awz138), 2019-05-03
Supplement: awz138_supplementary_data.pdf [file awz138_supplementary_data.pdf]

Supplementary material

| Baseline data                                         | Functional limb weakness |             |                  |                      | Neurological control subjects |             |                   |                      | Healthy control subjects |             |       |
|-------------------------------------------------------|--------------------------|-------------|------------------|----------------------|-------------------------------|-------------|-------------------|----------------------|--------------------------|-------------|-------|
|                                                       | FU<br>n= 65              | NFU<br>n=31 | Deceased<br>n=11 | Tests                | FU<br>n = 23                  | NFU<br>n=15 | Deceased<br>n = 8 | Tests                | FU<br>n=22               | NFU<br>n=15 | Tests |
| Age at symptom onset in years, mean(SD)               | 38 (10)                  | 35 (11)     | 48 (15)          | p=0.008 <sup>1</sup> | 39 (12)                       | 34 (9)      | 42 (12)           | NS                   | 41 (10)                  | 37 (16)     | NS    |
| Female (%)                                            | 86%                      | 68%         | 73%              | NS                   | 87%                           | 80%         | 75%               | NS                   | 95%                      | 87%         | NS    |
| Deprivation category                                  | 4 (1)                    | 4 (1)       | 2 (1)            | p<0.001 <sup>4</sup> | 3 (1)                         | 4 (2)       | 3 (3)             | NS                   | 3 (2)                    | 4 (2)       | NS    |
| Hysterectomy (%)                                      | 22%                      | 35%         | 0%               | NS                   | 4%                            | 7%          | 13%               | NS                   | 4,5%                     | 0%          | NS    |
| Benefits (%)                                          | 57%                      | 68%         | 36%              | NS                   | 30%                           | 53%         | 38%               | NS                   | 0%                       | 0%          | NS    |
| Smoker (%)                                            | 25%                      | 48%         | 45%              | p=0.048 <sup>3</sup> | 39%                           | 40%         | 63%               | NS                   | 13%                      | 23%         | NS    |
| Opioid drugs user (%)                                 | 35%                      | 29%         | 22%              | NS                   | 4%                            | 13%         | 13%               | NS                   | 0%                       | 0%          | NS    |
| Health related quality of life and functioning (SF36) |                          |             |                  |                      |                               |             |                   |                      |                          |             |       |
| General health (% fair/poor)*                         | 39%                      | 61%         | 78%              | p=0.031 <sup>2</sup> | 14%                           | 69%         | 25%               | p=0.003 <sup>3</sup> | 10%                      | 0%          | NS    |
| Physical functioning *                                | 35 (49)                  | 20 (35)     | 50 (55)          | NS                   | 45 (65)                       | 25 (50)     | 23 (68)           | NS                   | 95 (10)                  | 100 (5)     | NS    |
| Pain *                                                | 33 (35)                  | 28 (33)     | 45 (19)          | NS                   | 50 (24)                       | 45 (22)     | 38 (16)           | NS                   | 50 (40)                  | 50 (25)     | NS    |
| Energy *                                              | 25 (40)                  | 25 (20)     | 40 (45)          | NS                   | 33 (36)                       | 45 (33)     | 35 (32)           | NS                   | 50 (25)                  | 66 (40)     | NS    |
| Psychiatric co-morbidity                              |                          |             |                  |                      |                               |             |                   |                      |                          |             |       |
| Depression (HADS)*                                    | 8 (9)                    | 7 (11)      | 11 (9)           | NS                   | 6 (8)                         | 6 (8)       | 6 (11)            | NS                   | 4 (7)                    | 4 (4)       | NS    |
| Anxiety (HADS)*                                       | 7 (9)                    | 7 (10)      | 6 (7)            | NS                   | 4 (6)                         | 4 (5)       | 8 (8)             | NS                   | 1 (4)                    | 1 (2)       | NS    |
| Somatisation disorder (SCID) (%)                      | 20%                      | 42%         | 36%              | p=0.024 <sup>3</sup> | 0%                            | 0%          | 0%                | NA                   | 0%                       | 0%          | NA    |
| Total psychiatric diagnoses (SCID)                    | 2 (2)                    | 2 (2)       | 3 (5)            | NS                   | 1 (2)                         | 1 (2)       | 1 (1)             | NS                   | 0 (1)                    | 0 (0)       | NS    |

| Illness perception (IPQ)                          |       |       |       |    |       |       |       |    |    |    |    |
|---------------------------------------------------|-------|-------|-------|----|-------|-------|-------|----|----|----|----|
| ‘my illness is a mystery to me’                   | 2 (1) | 2 (2) | 1 (1) | NS | 4 (2) | 2 (1) | 2 (2) | NS | NA | NA | NA |
| ‘my symptoms are permanent rather than temporary’ | 3 (2) | 3 (1) | 3 (2) | NS | 4 (2) | 4 (1) | 4 (2) | NS | NA | NA | NA |

**Supplementary table 1.** Baseline comparison within and between group of participants in follow-up (FU), not in follow-up (NFU) and deceased subjects. Initial comparisons were made using chi square test and t-tests or Kruskal-Wallis test. In the healthy control group, the deceased are not included in the table, as in total only one patient died. \* SF36 and HADS data was missing in 6 healthy control subjects, 6 cases and 3 neurological controls. One-by-one comparisons using Mann-Witney U test: <sup>1</sup>Deceased were significantly different from FU and NFU, <sup>2</sup>deceased were significantly different from FU, <sup>3</sup>FU is significantly different from NFU, <sup>4</sup>All groups differ from each other. Low deprivation category (range 1-7) corresponds to worse deprivation. SF36 functioning and disability scale (range 0-100): high score means better functioning or less pain). Work and social adjustment scale, (range 0-40): higher score means worse impairment).

|                                                                     | Functional weakness (n in follow-up = 63) |                | Neurological controls (n in follow-up = 23) |                   |
|---------------------------------------------------------------------|-------------------------------------------|----------------|---------------------------------------------|-------------------|
| Weakness severity at follow-up                                      | Spearman's rho                            | P-value        | Spearman's rho                              | P-value           |
| Measures at follow-up:                                              |                                           |                |                                             |                   |
| General health (SF36) at FU                                         | 0.55                                      | p<0.001        | 0.41                                        | 0.053             |
| Change in general health                                            | -0.24                                     | p=0.058        | -0.26                                       | p=0.244           |
| Physical functioning (SF36) at FU                                   | -0.58                                     | p<0.001        | -0.83                                       | p<0.001           |
| Change in physical functioning                                      | -0.32                                     | p=0.011        | -0.71                                       | <b>p&lt;0.001</b> |
| Pain (SF36) at FU                                                   | -0.57                                     | p<0.001        | -0.40                                       | p=0.062           |
| Change in pain                                                      | -0.01                                     | p=0.929        | -0.61                                       | <b>p=0.003</b>    |
| Energy (SF36) at FU                                                 | -0.50                                     | p<0.001        | -0.41                                       | p=0.050           |
| Change in energy                                                    | -0.36                                     | <b>p=0.004</b> | 0.25                                        | p=0.262           |
| Work and social adjustment (WSAS) at FU                             | -0.47                                     | p<0.001        | 0.59                                        | p=0.003           |
| Depression (HADS) at FU                                             | 0.32                                      | p=0.009        | 0.36                                        | p=0.096           |
| Change in depression                                                | 0.25                                      | p=0.051        | -0.09                                       | p=0.683           |
| Anxiety (HADS) at FU                                                | 0.12                                      | p=0.352        | 0.33                                        | p=0.126           |
| Change in anxiety                                                   | 0.00                                      | p=0.982        | 0.18                                        | p=0.416           |
| IPQ total symptoms                                                  | 0.52                                      | p<0.001        | 0.34                                        | p=0.112           |
| Change in response to 'my weakness is a mystery to me'              | 0.23                                      | p=0.082        | -0.03                                       | p=0.898           |
| Change in response to 'stress or worry caused my symptoms'          | -0.13                                     | p=0.304        | 0.09                                        | p=0.702           |
| Change in response to 'damage to nervous system caused my symptoms' | 0.26                                      | p=0.043        | -0.02                                       | p=0.944           |
| Change in IPQ total symptoms                                        | 0.25                                      | p=0.048        | 0.25                                        | p=0.262           |
| Any treatment                                                       | 0.15                                      | p=0.237        | 0.27                                        | p=0.209           |

**Supplementary table 2. Correlations at follow-up.** Correlations between weakness outcome in the functional and neurological group and factors at follow-up (at FU) or differences between baseline and outcome (change).
